# Supplementary material for: HIF-1α triggers ER stress and CHOP-mediated apoptosis in alveolar epithelial cells, a key event in pulmonary fibrosis
Source: PubMed Central journal article supplement (PMC6299072; doi:10.1038/s41598-018-36063-2), 2018-12-18
Supplement: 41598_2018_36063_MOESM1_ESM.pdf [file 41598_2018_36063_MOESM1_ESM.pdf]

**HIF-1 $\alpha$  triggers ER stress and CHOP-mediated apoptosis in alveolar epithelial cells,  
a key event in pulmonary fibrosis.**

Eva Delbrel<sup>1</sup>, Abdoulaye Soumare<sup>1</sup>, Adnan Naguez<sup>1</sup>, Rabab Label<sup>1</sup>, Olivier Bernard<sup>1</sup>, Alain Bruhat<sup>3</sup>, Pierre Fafournoux<sup>3</sup>, Geoffrey Tremblais<sup>1</sup>, Dominique Marchant<sup>1</sup>, Thomas Gille<sup>1,2</sup>, Jean-François Bernaudin<sup>1,2,4</sup>, Patrice Callard<sup>4</sup>, Marianne Kambouchner<sup>2</sup>, Emmanuel Martinod<sup>1,2</sup>, Dominique Valeyre<sup>1,2</sup>, Yurdagül Uzunhan<sup>1,2</sup>, Carole Planès<sup>1,2</sup>, Emilie Boncoeur<sup>1</sup>

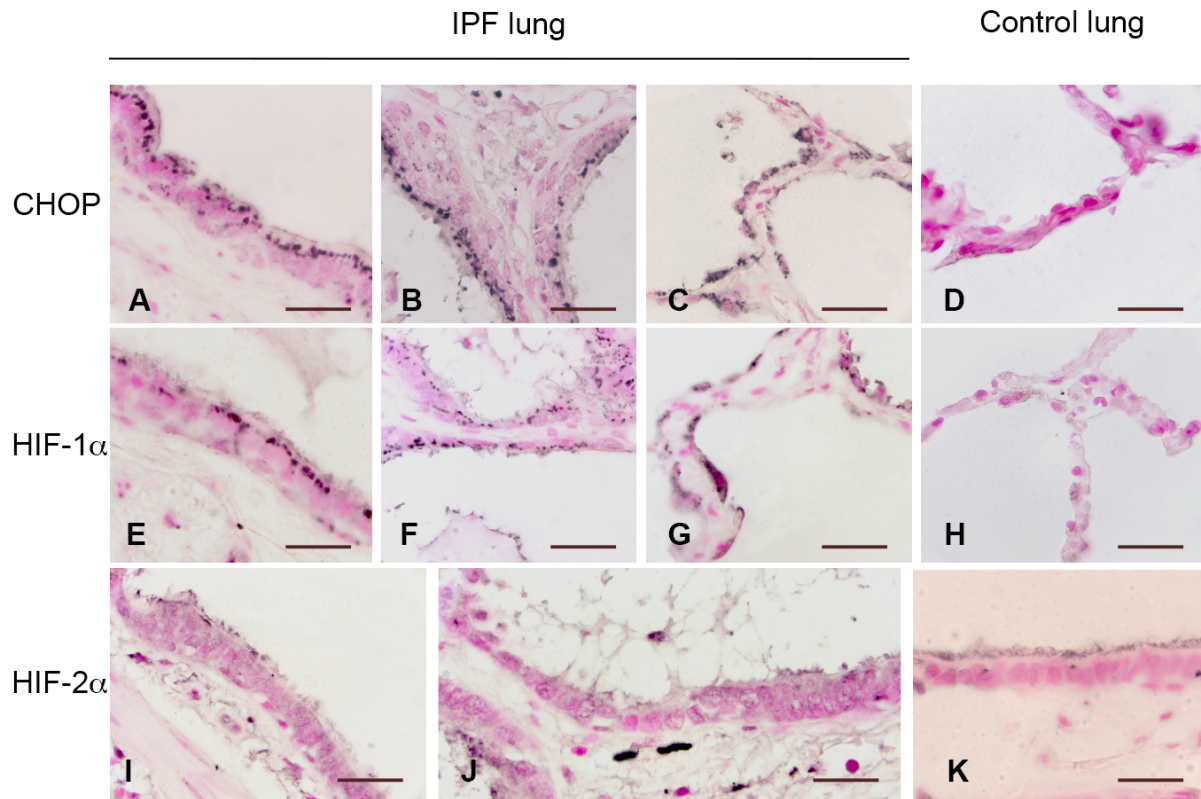

**Supplementary figure 1. Co-expression of CHOP and HIF-1 $\alpha$  in alveolar epithelial cells of patients with IPF.** CHOP and HIF-1 $\alpha$  expression in alveolar epithelial cells in UIP areas of patients with IPF (UIP) (A-C, E-G), and in normal lung sample (D, H, K). Supranuclear localization of CHOP (A, B) and HIF-1 $\alpha$  (E-F) in hyperplastic cells and in pneumocytes in a less fibrotic region (C and G respectively). No labelling was observed for isotype control (L), nor HIF-2 $\alpha$  except a faint nonspecific extracellular one above the ciliated cells in a bronchiolization area (I, J). No labelling was observed for CHOP (D) or HIF-1 $\alpha$  (H) in the alveolar cells in normal lung (D, H). Sections were counterstained with Nuclear Fast Red. Original magnification: x400. Scale bars represent 200  $\mu$ m.

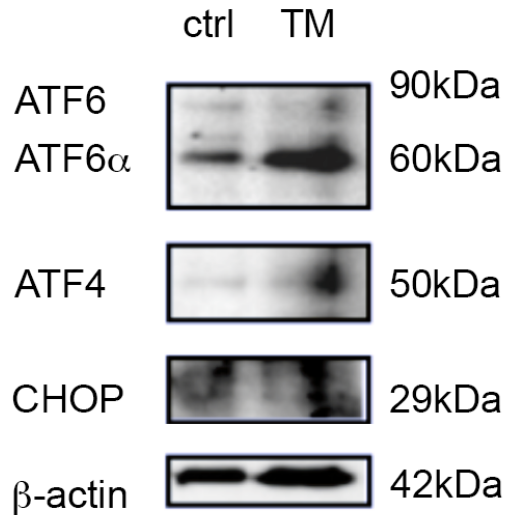

**Supplementary figure 2. Tunicamycin induces UPR pathways activation in AECs.** Primary rat AECs were treated with the ER stress inducer tunicamycin (TM, 1  $\mu$ g/ml) or with vehicle (ctrl) for 24 h, and protein levels of ATF6, ATF6 $\alpha$ , ATF4, and CHOP were evaluated by western blotting. Representative blot from at least n = 3 independent experiments is shown.

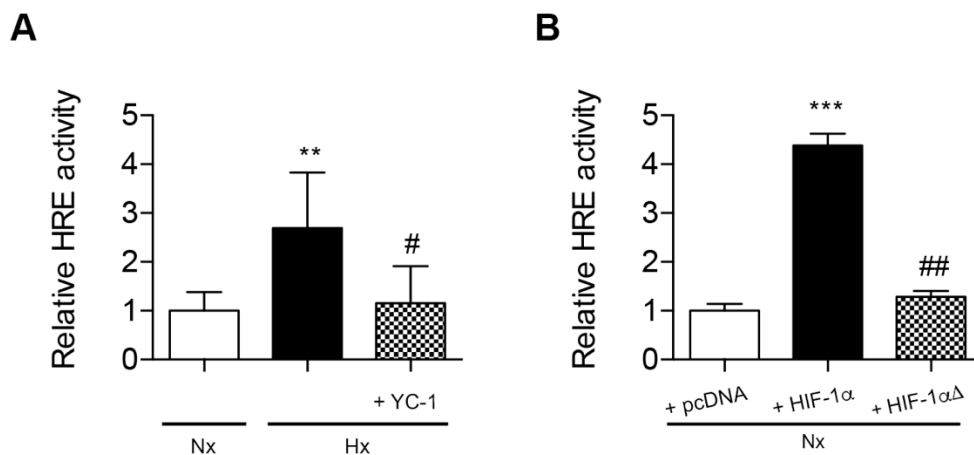

**Supplementary figure 3. Modulation of HIF-1 $\alpha$  transactivation activity by YC-1 treatment and by HIF-1 $\alpha$  overexpression.** Primary rat AECs transfected with a plasmid encoding for luciferase reporter activity of hypoxia response element (HRE) and treated or not with the HIF-1 $\alpha$  inhibitor YC-1 (10  $\mu$ M) were exposed to normoxia (Nx) (21% of O<sub>2</sub>) or hypoxia (Hx) (1.5% of O<sub>2</sub>) for 24 h (A). A549 were co-transfected with either an empty pcDNA3.1 vector or a plasmid encoding HIF-1 $\alpha$  or a mutated HIF-1 $\alpha$  (HIF-1 $\alpha\Delta$ ), and with a plasmid coding for

luciferase reporter activity of HRE (B). HRE relative transcriptional activity was evaluated 48 h post-transfection. n = at least 6 experiments. Data were submitted to a Kruskal-Wallis one-way analysis of variance followed by a Dunn's multiple comparison tests. \*\*:  $P < 0.01$  and \*\*\*:  $P < 0.001$ : significantly different from control value in normoxic cells (untreated or transfected with pcDNA). #:  $P < 0.05$  and ##:  $P < 0.01$ : significantly different from values in untreated hypoxic cells or in hypoxic cells transfected with pcDNA3.1 plasmid.

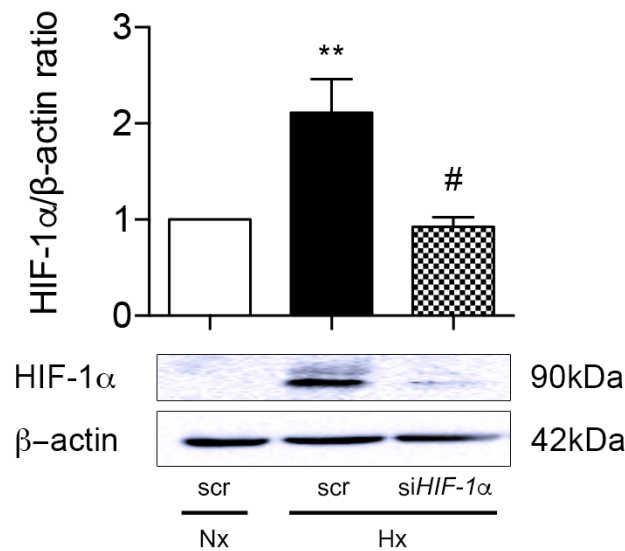

**Supplementary figure 4. Extinction of HIF-1 $\alpha$  expression by siRNA.** A549 cells were transfected with scrambled (scr) or *HIF-1 $\alpha$*  siRNA. 24 h post-transfection, A459 cells were placed 24 h hypoxia (0.5% of O<sub>2</sub>). HIF-1 $\alpha$  protein levels were evaluated by western blot 48 h post-transfection. n = 3 experiments, data were submitted to a Kruskal-Wallis one-way analysis of variance followed by a Dunn's multiple comparison tests. \*\*:  $P < 0.01$ : significantly different from normoxic condition and #:  $P < 0.05$ : significantly different as compared with hypoxic cells transfected with scrambled siRNA.
